# Supplementary material for: Insights into Body Size Evolution: A Comparative Transcriptome Study on Three Species of Asian Sisoridae Catfish
Source: MDPI journal article supplement (doi:10.3390/ijms20040944), 2019-02-21
Supplement: s1 [file s1]

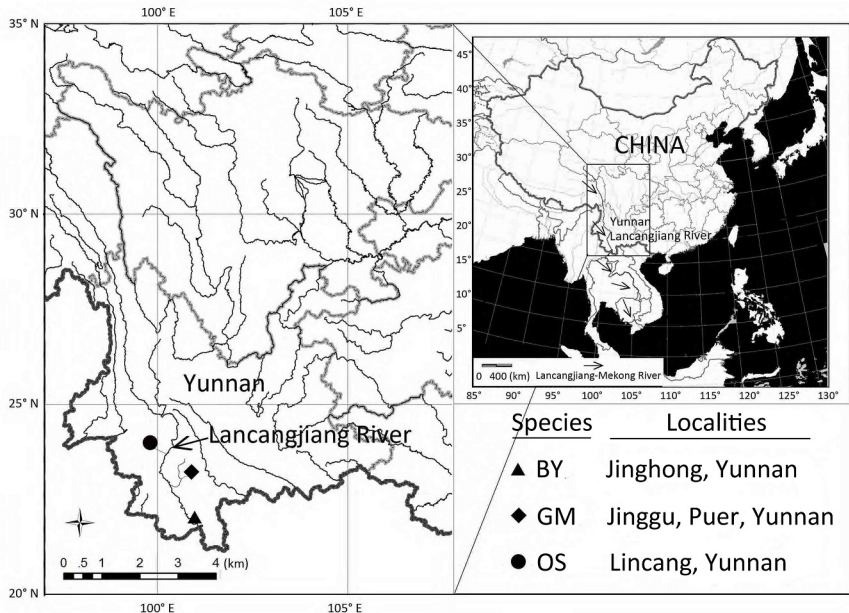

Figure S1. The collection localities of BY, GM and OS used in this study.

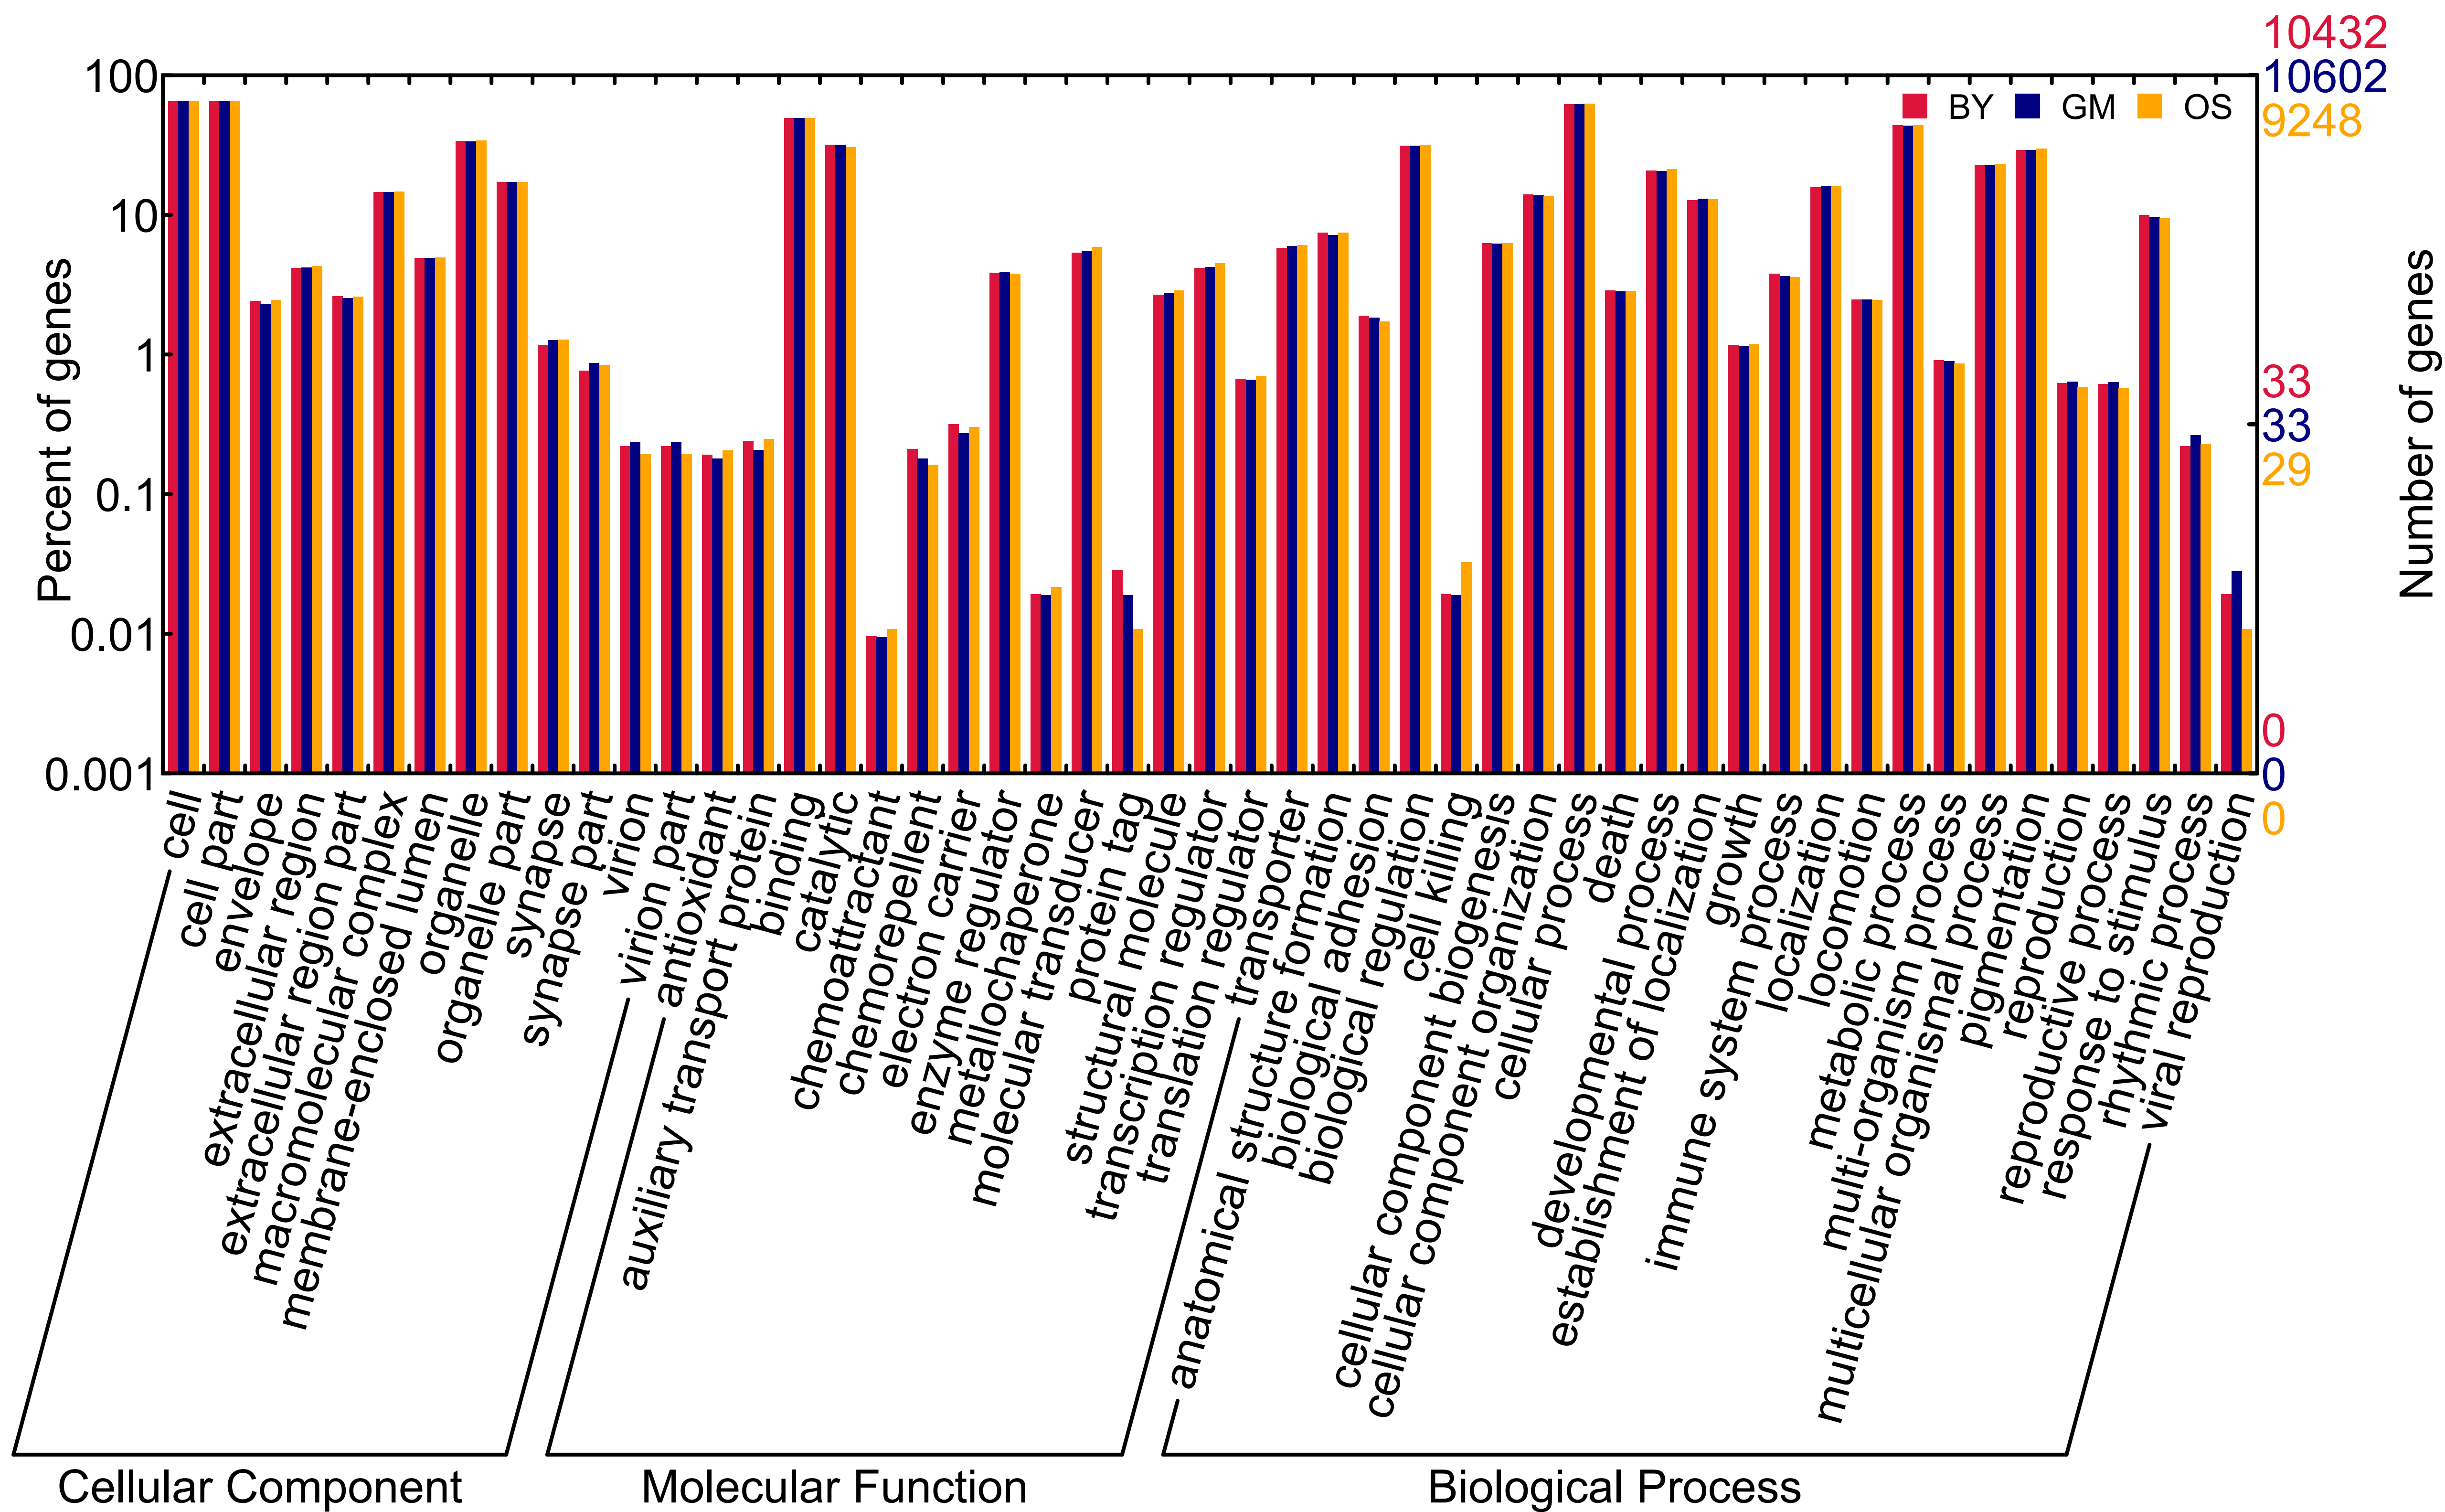

Figure S2. GO classification of annotated genes in the BY, GM, and OS groups.
